# Supplementary material
Source: Springer Nature journal article supplement (https://www.springermedizin.de/resource/supplementary/12936_2011_1987_MOESM2_ESM.pdf/9542176)

**ANG-1**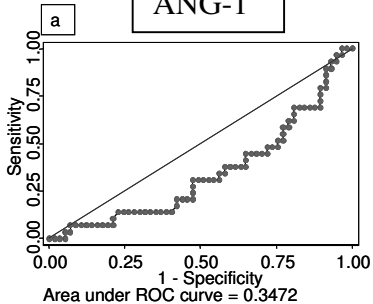**ANG-2**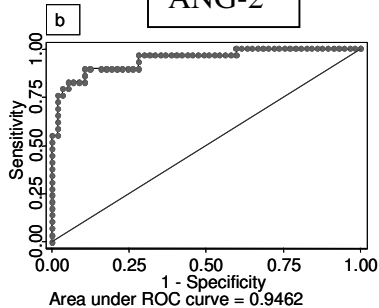**ANG-2/ANG-1**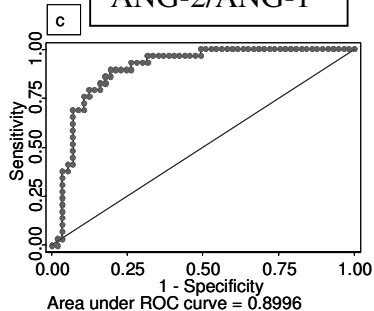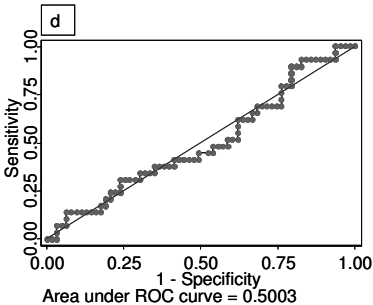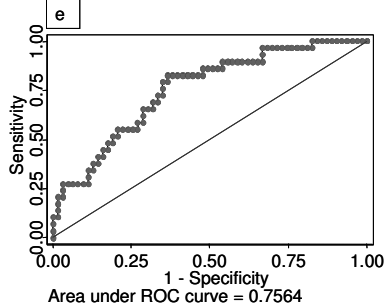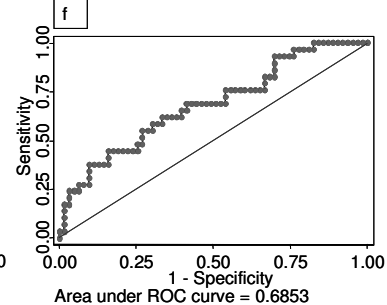

Supplement: MOESM2 [file 9542176]
